# Supplementary material for: Prehospital acute traumatic pain assessment and management practices in the Western Cape, South Africa: a retrospective review
Source: Int J Emerg Med. 2020 May 5;13:21. doi: 10.1186/s12245-020-00278-w (PMC7201999; doi:10.1186/s12245-020-00278-w)
Supplement: Supplementary file 1 — Additional file 1: Types of emergency incidents. [file 12245_2020_278_MOESM1_ESM.pdf]

**Additional File 1: Types of emergency incidents**

| Incident Type                           | n (%)              |
|-----------------------------------------|--------------------|
| Assault <sup>a</sup>                    | 1211 (50.4%)       |
| Transport-related incident <sup>b</sup> | 492 (20.5%)        |
| Accidental injury <sup>c</sup>          | 380 (15.8%)        |
| Burns <sup>d</sup>                      | 90 (3.8%)          |
| Self-harm                               | 90 (3.8%)          |
| Gunshot wound (GSW)                     | 68 (2.8%)          |
| Environmental                           | 63 (2.6%)          |
| Drowning                                | 4 (0.2%)           |
| Electrocution                           | 3 (0.1%)           |
| <b>Total</b>                            | <b>2401 (100%)</b> |

**Footnote:** <sup>a</sup> Includes physical assault, assault with a weapon and sexual assault, <sup>b</sup> Includes light motor vehicle, bus/taxi, truck/heavy vehicle, motorcyclist, cyclist, pedestrian, train, and railway incidents, <sup>c</sup> Includes domestic, sport and industrial accidental injuries, <sup>d</sup> Includes burns and corrosives, residential and informal structure fires.
